# Supplementary material for: Constitutive activation of MET signaling impairs myogenic differentiation of rhabdomyosarcoma and promotes its development and progression
Source: PubMed Central journal article supplement (PMC4741613; doi:10.18632/oncotarget.5145), 2015-09-08
Supplement: oncotarget-06-31378-s001.pdf [file oncotarget-06-31378-s001.pdf]

## SUPPLEMENTARY TABLE AND FIGURES

Supplementary Table 1: Values of the Pearson correlation between MET and myogenic differentiation markers in RMS tumors.

|                  | <b>MET</b>                          | <b>MYF5</b>                         | <b>MyoD</b>                         | <b>MEF2A</b>                        | <b>myogenin</b>                     | <b>myostatin</b>                     | <b>MYH2</b>                          |
|------------------|-------------------------------------|-------------------------------------|-------------------------------------|-------------------------------------|-------------------------------------|--------------------------------------|--------------------------------------|
| <b>MET</b>       |                                     | <b>R = -0.68</b><br><i>p</i> = 0.06 | <b>R = 0.87</b><br><i>p</i> = 0.005 | <b>R = -0.33</b><br><i>p</i> = 0.42 | <b>R = -0.43</b><br><i>p</i> = 0.29 | <b>R = 0.26</b><br><i>p</i> = 0.53   | <b>R = -0.55</b><br><i>p</i> = 0.16  |
| <b>MYF5</b>      | <b>R = -0.68</b><br><i>p</i> = 0.06 |                                     | <b>R = -0.58</b><br><i>p</i> = 0.14 | <b>R = -0.08</b><br><i>p</i> = 0.86 | <b>R = 0.16</b><br><i>p</i> = 0.71  | <b>R = 0.02</b><br><i>p</i> = 0.96   | <b>R = 0.45</b><br><i>p</i> = 0.26   |
| <b>MyoD</b>      | <b>R = 0.87</b><br><i>p</i> = 0.005 | <b>R = -0.58</b><br><i>p</i> = 0.14 |                                     | <b>R = -0.37</b><br><i>p</i> = 0.36 | <b>R = -0.42</b><br><i>p</i> = 0.30 | <b>R = 0.27</b><br><i>p</i> = 0.52   | <b>R = -0.39</b><br><i>p</i> = 0.34  |
| <b>MEF2A</b>     | <b>R = -0.33</b><br><i>p</i> = 0.42 | <b>R = -0.08</b><br><i>p</i> = 0.86 | <b>R = -0.37</b><br><i>p</i> = 0.36 |                                     | <b>R = 0.92</b><br><i>p</i> = 0.001 | <b>R = -0.49</b><br><i>p</i> = 0.22  | <b>R = 0.69</b><br><i>p</i> = 0.06   |
| <b>myogenin</b>  | <b>R = -0.43</b><br><i>p</i> = 0.29 | <b>R = 0.16</b><br><i>p</i> = 0.71  | <b>R = -0.42</b><br><i>p</i> = 0.30 | <b>R = 0.92</b><br><i>p</i> = 0.001 |                                     | <b>R = -0.21</b><br><i>p</i> = 0.62  | <b>R = 0.89</b><br><i>p</i> = 0.003  |
| <b>myostatin</b> | <b>R = 0.26</b><br><i>p</i> = 0.53  | <b>R = 0.02</b><br><i>p</i> = 0.96  | <b>R = 0.27</b><br><i>p</i> = 0.52  | <b>R = -0.49</b><br><i>p</i> = 0.22 | <b>R = -0.21</b><br><i>p</i> = 0.62 |                                      | <b>R = 0.0005</b><br><i>p</i> = 0.99 |
| <b>MYH2</b>      | <b>R = -0.55</b><br><i>p</i> = 0.16 | <b>R = 0.45</b><br><i>p</i> = 0.26  | <b>R = -0.39</b><br><i>p</i> = 0.34 | <b>R = 0.69</b><br><i>p</i> = 0.06  | <b>R = 0.89</b><br><i>p</i> = 0.003 | <b>R = 0.0005</b><br><i>p</i> = 0.99 |                                      |

Expression of genes was evaluated by qPCR in paraffin-embedded RMS specimens, *n* = 8, R = correlation coefficient, *p* < 0.05 considered as significant.

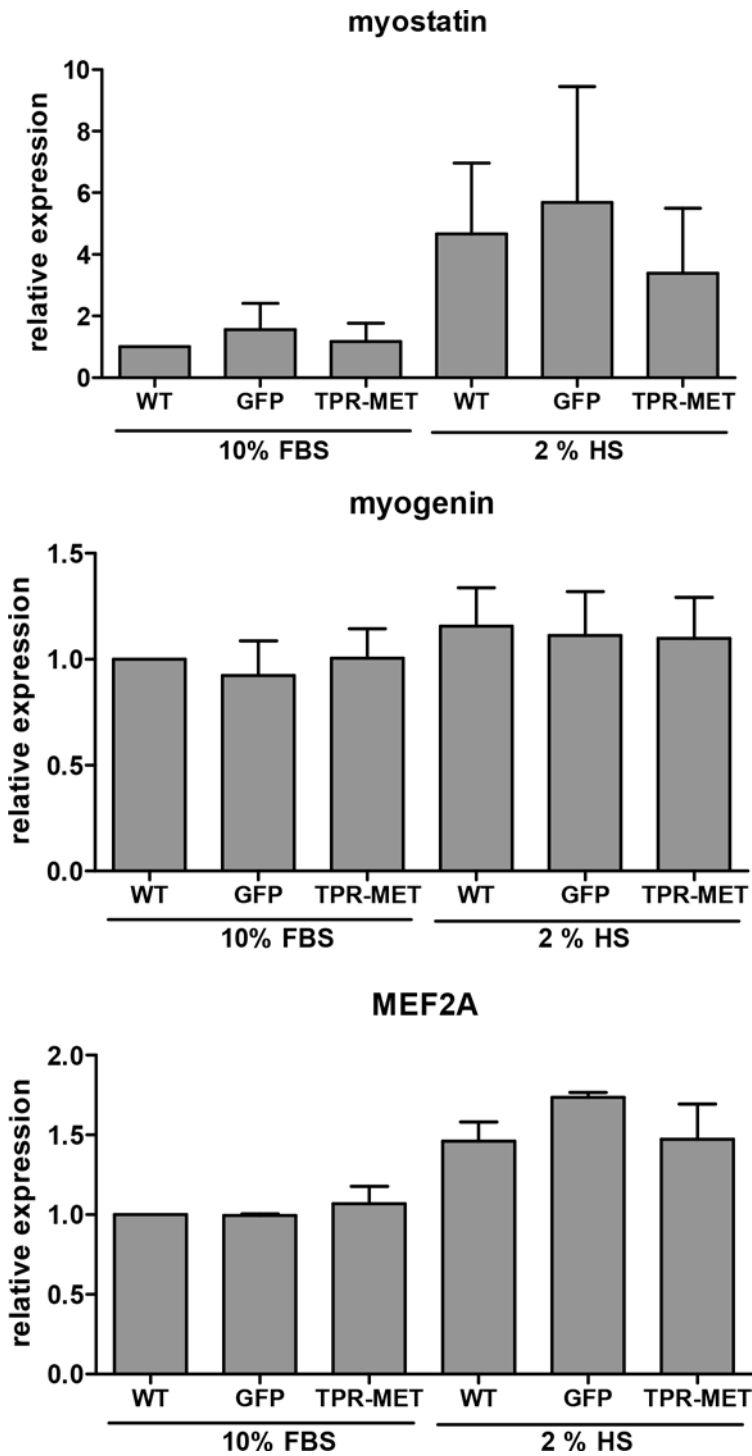

**Supplementary Figure 1: Myostatin and MEF2A are slightly upregulated in SMS-CTR cells cultured in DMEM with 2% HS.** Expression of myostatin, myogenin and MEF2A was evaluated by qPCR in samples from SMS-CTR cells,  $n = 2$ . Data in graphs are represented as mean  $\pm$  SEM.

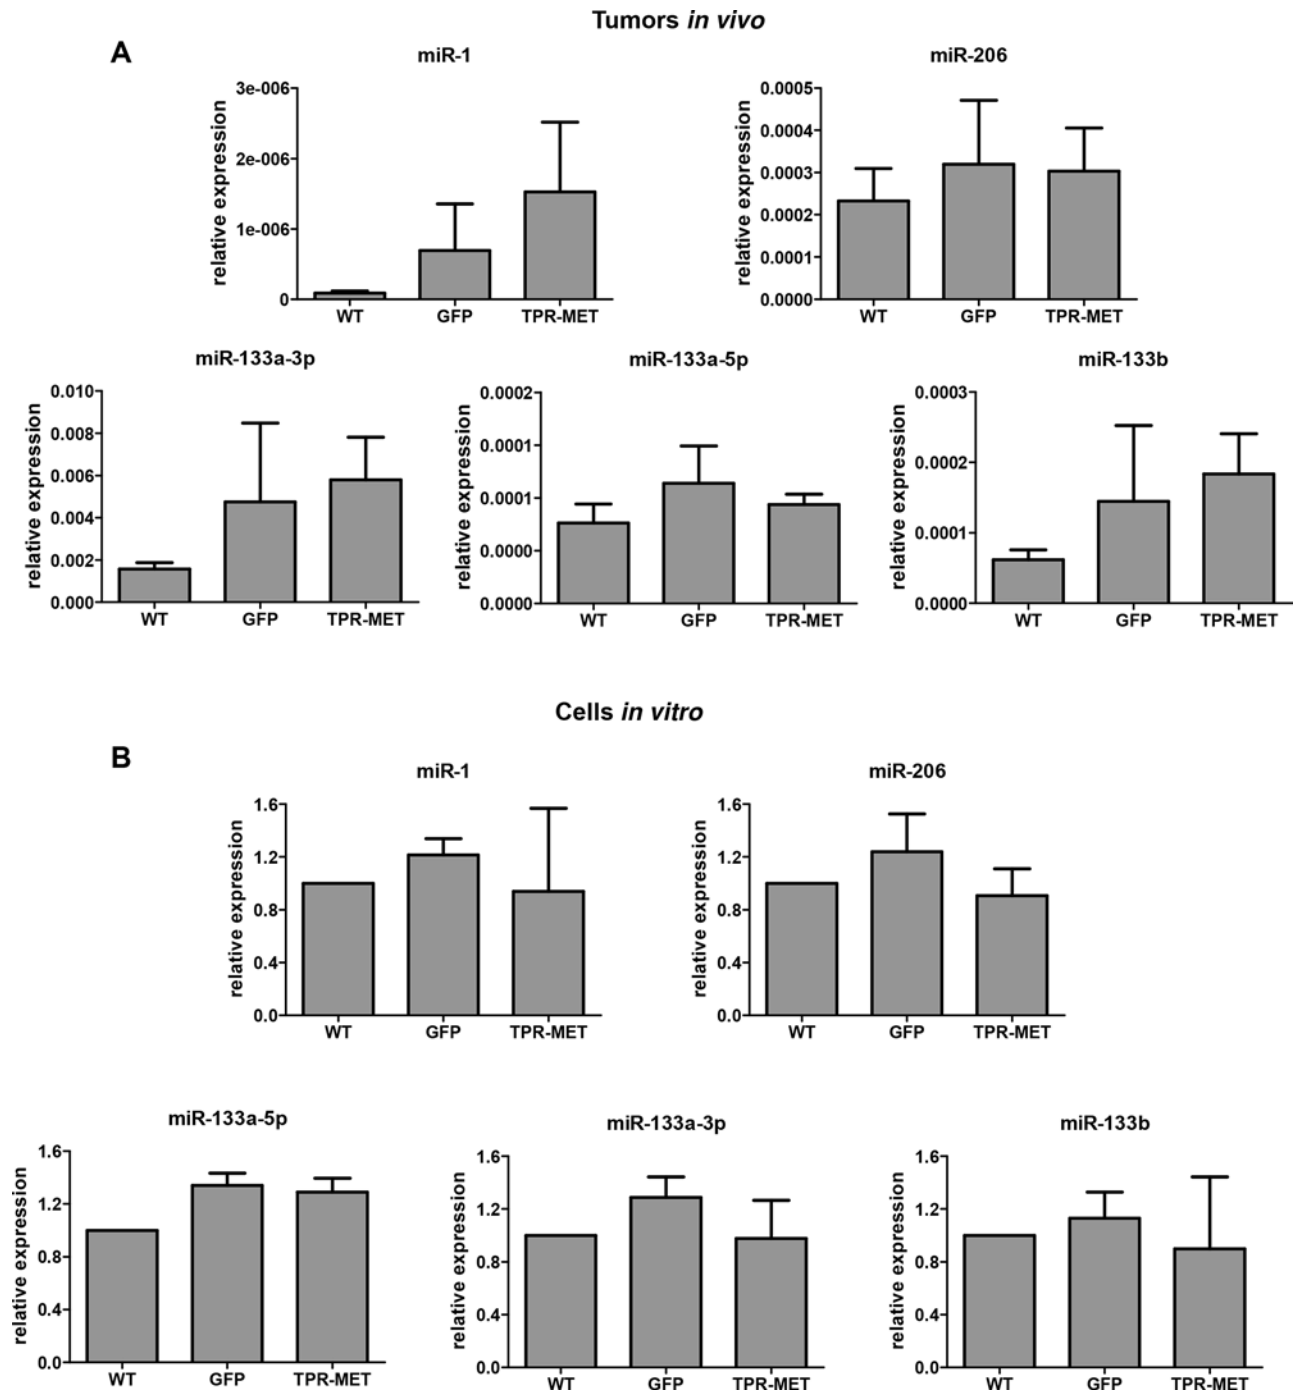

**Supplementary Figure 2: The effects of TPR-MET are independent of myomiRs action.** Expression of miR-1, miR-206, miR-133a-3p, miR-133a-5p and miR-133b was estimated by quantitative PCR in tumors formed by SMS-CTR cells after subcutaneous implantation to NOD-SCID mice,  $n = 4-5$  (A) and in SMS-CTR cells *in vitro*,  $n = 2$  (B) Data in graphs are represented as mean  $\pm$  SEM.

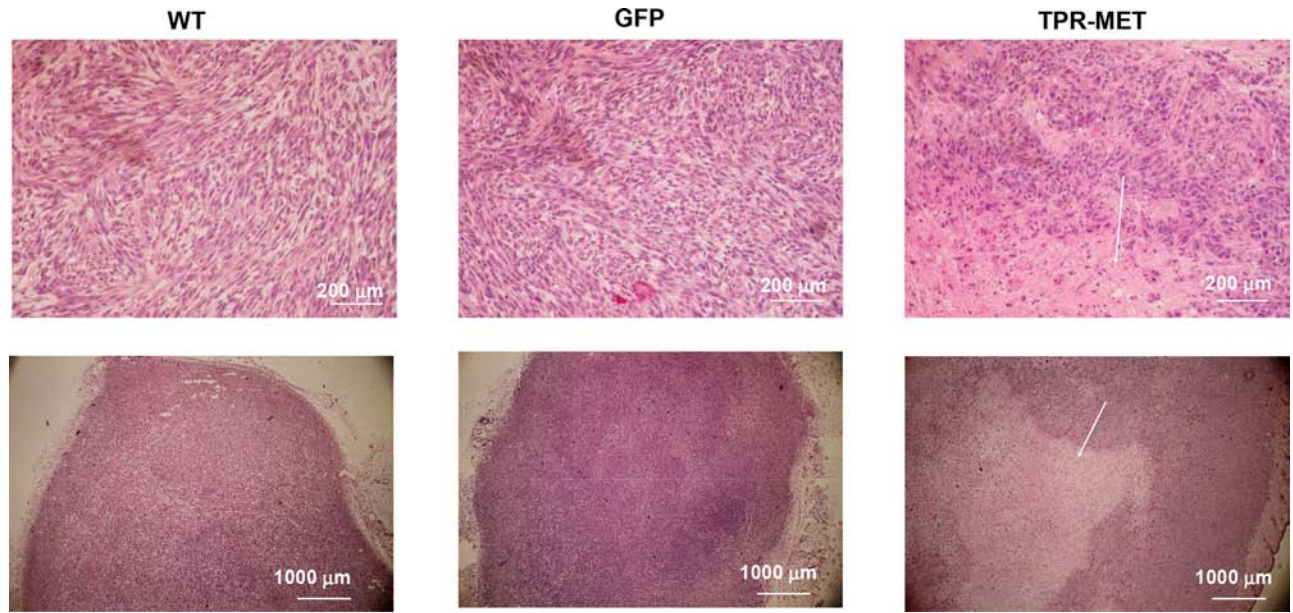

**Supplementary Figure 3: Necrosis in tumors formed by SMS-CTR cells expressing TPR-MET.** Representative images of tumors sections stained with hematoxylin-eosin show necrotic areas in TPR-MET tumors, which are indicated with arrows.
